# Supplementary material for: Association of physical activity and sedentary behavior with type 2 diabetes and glycemic traits: a two-sample Mendelian randomization study
Source: PubMed Central journal article supplement — BMJ Open Diabetes Res Care. 2020 Dec 8;8(2):e001896. doi: 10.1136/bmjdrc-2020-001896 (PMC7725078; doi:10.1136/bmjdrc-2020-001896), 2020-12-08
Supplement: bmjdrc-2020-001896supp001.pdf [file bmjdrc-2020-001896supp001.pdf]

**Association of Physical Activity and Sedentary Behavior with Type 2 Diabetes  
and Glycemic Traits: a two-sample Mendelian randomization study**

Christa Meisinger et al.

Supplement

Table 1 Exposure IV-association

| SNP                                           | Chr | Pos (hg38) | EA | O<br>A | EAF   | BETA   | SE    | P-value              | R <sup>2</sup> | F      |
|-----------------------------------------------|-----|------------|----|--------|-------|--------|-------|----------------------|----------------|--------|
| Average accelerometer-based physical activity |     |            |    |        |       |        |       |                      |                |        |
| rs34517439                                    | 1   | 77984833   | C  | A      | 0.879 | 0.308  | 0.056 | 4.4x10 <sup>-8</sup> | 0.00033        | 29.972 |
| rs336605                                      | 3   | 18614858   | G  | T      | 0.276 | 0.222  | 0.041 | 4.5x10 <sup>-8</sup> | 0.00033        | 29.913 |
| rs10067451                                    | 5   | 88646688   | G  | A      | 0.887 | 0.326  | 0.058 | 2.5x10 <sup>-8</sup> | 0.00034        | 31.077 |
| rs7084454                                     | 10  | 21532345   | G  | A      | 0.676 | 0.222  | 0.039 | 1.0x10 <sup>-8</sup> | 0.00036        | 32.753 |
| rs148193266                                   | 11  | 104657953  | A  | C      | 0.957 | -0.510 | 0.092 | 3.1x10 <sup>-8</sup> | 0.00034        | 30.670 |
| rs79724577                                    | 17  | 45386127   | A  | C      | 0.818 | -0.276 | 0.047 | 4.6x10 <sup>-9</sup> | 0.00038        | 34.369 |
| rs1518139                                     | 18  | 43171267   | G  | T      | 0.662 | -0.226 | 0.039 | 4.5x10 <sup>-9</sup> | 0.00038        | 34.415 |
| accelerometer-based physical activity>425mg   |     |            |    |        |       |        |       |                      |                |        |
| rs17006599                                    | 1   | 219763423  | A  | G      | 0.800 | 0.027  | 0.005 | 1.0x10 <sup>-7</sup> | 0.00031        | 28.350 |
| rs6433478                                     | 2   | 174376754  | T  | C      | 0.457 | -0.024 | 0.004 | 1.2x10 <sup>-8</sup> | 0.00036        | 32.465 |
| rs62443625                                    | 7   | 39013531   | T  | C      | 0.767 | -0.026 | 0.005 | 1.4x10 <sup>-7</sup> | 0.00031        | 27.683 |
| rs72633364                                    | 8   | 34329370   | G  | A      | 0.711 | -0.023 | 0.005 | 4.1x10 <sup>-7</sup> | 0.00028        | 25.635 |
| rs4754194                                     | 11  | 107219461  | C  | T      | 0.773 | -0.025 | 0.005 | 2.4x10 <sup>-7</sup> | 0.00029        | 26.642 |
| rs743580                                      | 15  | 74035775   | A  | G      | 0.510 | 0.025  | 0.004 | 1.3x10 <sup>-9</sup> | 0.00041        | 36.764 |
| rs56194509                                    | 17  | 45767193   | T  | G      | 0.780 | -0.025 | 0.005 | 3.9x10 <sup>-7</sup> | 0.00028        | 25.743 |
| rs1668835                                     | 18  | 24898988   | T  | A      | 0.688 | -0.023 | 0.004 | 3.1x10 <sup>-7</sup> | 0.00029        | 26.184 |
| Sedentary behaviour (MET ≤1.5)                |     |            |    |        |       |        |       |                      |                |        |
| rs61776614                                    | 1   | 2234967    | C  | T      | 0.925 | 0.050  | 0.009 | 3.9x10 <sup>-8</sup> | 0.00033        | 30.182 |
| rs6801032                                     | 3   | 68455263   | A  | G      | 0.261 | 0.031  | 0.005 | 5.6x10 <sup>-9</sup> | 0.00037        | 33.953 |
| rs153685                                      | 5   | 88685213   | C  | T      | 0.381 | 0.028  | 0.005 | 6.5x10 <sup>-9</sup> | 0.00037        | 33.680 |
| rs27853                                       | 5   | 107482386  | C  | G      | 0.520 | 0.027  | 0.005 | 1.3x10 <sup>-8</sup> | 0.00035        | 32.323 |
| rs6870096                                     | 5   | 152566250  | C  | G      | 0.321 | -0.028 | 0.005 | 2.4x10 <sup>-8</sup> | 0.00034        | 31.149 |
| rs73143219                                    | 7   | 72221624   | C  | T      | 0.554 | 0.027  | 0.005 | 9.6x10 <sup>-9</sup> | 0.00036        | 32.917 |

Table 2 Association of genome wide significant SNPs used as instruments for accelerometer- average accelerations with T2D and glycemic traits

| SNP             | Chr | Pos (hg38) | EA | OA | N <sub>outcome</sub> | EAF   | BETA   | SE    | P-value |
|-----------------|-----|------------|----|----|----------------------|-------|--------|-------|---------|
| Type 2 diabetes |     |            |    |    |                      |       |        |       |         |
| rs34517439      | 1   | 77984833   | C  | A  | 898130               | 0.880 | 0.013  | 0.010 | 0.2000  |
| rs336605        | 3   | 18614858   | G  | T  | 898130               | 0.280 | -0.026 | 0.007 | 0.0003  |
| rs10067451      | 5   | 88646688   | G  | A  | 898130               | 0.890 | 0.035  | 0.010 | 0.0008  |
| rs7084454       | 10  | 21532345   | G  | A  | 898130               | 0.680 | 0.002  | 0.007 | 0.7700  |
| rs148193266     | 11  | 104657953  | A  | C  | 898130               | 0.960 | -0.006 | 0.016 | 0.7000  |
| rs79724577      | 17  | 45386127   | A  | C  | 898130               | 0.820 | -0.019 | 0.008 | 0.0250  |
| rs1518139       | 18  | 43171267   | G  | T  | 898130               | 0.660 | 0.023  | 0.007 | 0.0008  |
| HbA1c           |     |            |    |    |                      |       |        |       |         |
| rs336605        | 3   | 18614858   | G  | T  | 123665               | 0.274 | 0.001  | 0.002 | 0.5419  |
| rs10067451      | 5   | 88646688   | G  | A  | 123665               | 0.917 | 0.001  | 0.003 | 0.6993  |
| rs7084454       | 10  | 21532345   | G  | A  | 123665               | 0.742 | 0.004  | 0.002 | 0.0665  |
| rs79724577      | 17  | 45386127   | A  | C  | 123665               | 0.841 | 0.002  | 0.002 | 0.3589  |
| rs1518139       | 18  | 43171267   | G  | T  | 123665               | 0.642 | 0.002  | 0.002 | 0.4209  |
| Fasting glucose |     |            |    |    |                      |       |        |       |         |
| rs336605        | 3   | 18614858   | G  | T  | 58074                | 0.726 | 0.001  | 0.004 | 0.8112  |
| rs10067451      | 5   | 88646688   | G  | A  | 58074                | 0.917 | -0.002 | 0.006 | 0.7182  |
| rs7084454       | 10  | 21532345   | G  | A  | 58074                | 0.742 | 0.003  | 0.004 | 0.4152  |
| rs79724577      | 17  | 45386127   | A  | C  | 58074                | 0.841 | 0.005  | 0.005 | 0.2922  |
| rs1518139       | 18  | 43171267   | G  | T  | 58074                | 0.642 | 0.000  | 0.004 | 0.9150  |
| HOMA-B          |     |            |    |    |                      |       |        |       |         |
| rs336605        | 3   | 18614858   | G  | T  | 36466                | 0.726 | -0.002 | 0.004 | 0.5782  |
| rs10067451      | 5   | 88646688   | G  | A  | 36466                | 0.917 | 0.009  | 0.006 | 0.1391  |
| rs7084454       | 10  | 21532345   | G  | A  | 36466                | 0.742 | -0.005 | 0.004 | 0.1411  |
| rs79724577      | 17  | 45386127   | A  | C  | 36466                | 0.841 | -0.006 | 0.005 | 0.2410  |
| rs1518139       | 18  | 43171267   | G  | T  | 36466                | 0.642 | 0.004  | 0.003 | 0.3031  |
| HOMA-IR         |     |            |    |    |                      |       |        |       |         |
| rs336605        | 3   | 18614858   | G  | T  | 37037                | 0.726 | -0.004 | 0.004 | 0.4127  |
| rs10067451      | 5   | 88646688   | G  | A  | 37037                | 0.917 | 0.010  | 0.007 | 0.1499  |
| rs7084454       | 10  | 21532345   | G  | A  | 37037                | 0.742 | 0.000  | 0.004 | 0.9406  |
| rs79724577      | 17  | 45386127   | A  | C  | 37037                | 0.841 | -0.001 | 0.006 | 0.8197  |
| rs1518139       | 18  | 43171267   | G  | T  | 37037                | 0.642 | 0.004  | 0.004 | 0.3116  |

EA, effect allele. OA, other allele. EAF, effect allele frequency. SE, standard error

Supplementary Table 3 Association of genome wide significant SNPs used as instruments for accelerometer-based vigorous physical activity (&gt;425 mg) with T2D and glycemic traits

| SNP             | Chr | Pos (hg38) | EA | OA | N <sub>outcome</sub> | EAF   | BETA   | SE    | P-value |
|-----------------|-----|------------|----|----|----------------------|-------|--------|-------|---------|
| Type 2 diabetes |     |            |    |    |                      |       |        |       |         |
| rs17006599      | 1   | 219763423  | A  | G  | 898130               | 0.790 | 0.012  | 0.008 | 0.1400  |
| rs6433478       | 2   | 174376754  | T  | C  | 898130               | 0.470 | 0.017  | 0.006 | 0.0087  |
| rs62443625      | 7   | 39013531   | T  | C  | 898130               | 0.770 | 0.010  | 0.008 | 0.1900  |
| rs72633364      | 8   | 34329370   | G  | A  | 898130               | 0.710 | -0.003 | 0.008 | 0.6600  |
| rs4754194       | 11  | 107219461  | C  | T  | 898130               | 0.770 | 0.009  | 0.008 | 0.2500  |
| rs743580        | 15  | 74035775   | A  | G  | 898130               | 0.500 | -0.022 | 0.006 | 0.0006  |
| rs56194509      | 17  | 45767193   | T  | G  | 898130               | 0.790 | -0.018 | 0.008 | 0.0210  |
| rs1668835       | 18  | 24898988   | T  | A  | 898130               | 0.680 | -0.002 | 0.007 | 0.8200  |
| HbA1c           |     |            |    |    |                      |       |        |       |         |
| rs17006599      | 1   | 219763423  | A  | G  | 123665               | 0.779 | 0.001  | 0.002 | 0.5499  |
| rs62443625      | 7   | 39013531   | T  | C  | 123665               | 0.758 | -0.001 | 0.002 | 0.7475  |
| rs4754194       | 11  | 107219461  | C  | T  | 123665               | 0.757 | 0.003  | 0.002 | 0.1764  |
| rs743580        | 15  | 74035775   | A  | G  | 123665               | 0.518 | 0.001  | 0.002 | 0.5761  |
| rs56194509      | 17  | 45767193   | T  | G  | 123665               | 0.800 | 0.003  | 0.002 | 0.1677  |
| rs1668835       | 18  | 24898988   | T  | A  | 123665               | 0.678 | 0.000  | 0.002 | 0.9190  |
| Fasting glucose |     |            |    |    |                      |       |        |       |         |
| rs17006599      | 1   | 219763423  | A  | G  | 58074                | 0.221 | 0.002  | 0.004 | 0.7401  |
| rs62443625      | 7   | 39013531   | T  | C  | 58074                | 0.758 | 0.000  | 0.004 | 0.9649  |
| rs4754194       | 11  | 107219461  | C  | T  | 58074                | 0.757 | 0.007  | 0.004 | 0.1327  |
| rs743580        | 15  | 74035775   | A  | G  | 58074                | 0.518 | 0.002  | 0.006 | 0.7489  |
| rs56194509      | 17  | 45767193   | T  | G  | 58074                | 0.800 | -0.004 | 0.005 | 0.4420  |
| rs1668835       | 18  | 24898988   | T  | A  | 58074                | 0.678 | -0.009 | 0.004 | 0.0237  |
| HOMA-B          |     |            |    |    |                      |       |        |       |         |
| rs17006599      | 1   | 219763423  | A  | G  | 36466                | 0.221 | 0.005  | 0.004 | 0.1988  |
| rs62443625      | 7   | 39013531   | T  | C  | 36466                | 0.758 | 0.000  | 0.004 | 0.9770  |
| rs4754194       | 11  | 107219461  | C  | T  | 36466                | 0.757 | 0.000  | 0.004 | 0.9334  |
| rs743580        | 15  | 74035775   | A  | G  | 36466                | 0.518 | -0.002 | 0.006 | 0.8207  |
| rs56194509      | 17  | 45767193   | T  | G  | 36466                | 0.800 | 0.005  | 0.004 | 0.2880  |
| rs1668835       | 18  | 24898988   | T  | A  | 36466                | 0.678 | -0.007 | 0.004 | 0.0473  |
| HOMA-IR         |     |            |    |    |                      |       |        |       |         |
| rs17006599      | 1   | 219763423  | A  | G  | 37037                | 0.221 | 0.004  | 0.005 | 0.3873  |
| rs62443625      | 7   | 39013531   | T  | C  | 37037                | 0.758 | 0.002  | 0.005 | 0.6537  |
| rs4754194       | 11  | 107219461  | C  | T  | 37037                | 0.757 | 0.002  | 0.005 | 0.7261  |
| rs743580        | 15  | 74035775   | A  | G  | 37037                | 0.518 | -0.002 | 0.007 | 0.7670  |
| rs56194509      | 17  | 45767193   | T  | G  | 37037                | 0.800 | 0.001  | 0.005 | 0.8908  |
| rs1668835       | 18  | 24898988   | T  | A  | 37037                | 0.678 | -0.013 | 0.004 | 0.0016  |

EA, effect allele. OA, other allele. EAF, effect allele frequency. SE, standard error.

Table 4 Association of genome wide significant SNPs used as instruments for sedentary behavior with T2D and glycemic traits

| SNP             | Chr | Pos (hg38) | EA | OA | N <sub>outcome</sub> | EAF   | BETA   | SE    | P-value |
|-----------------|-----|------------|----|----|----------------------|-------|--------|-------|---------|
| Type 2 diabetes |     |            |    |    |                      |       |        |       |         |
| rs61776614      | 1   | 2234967    | C  | T  | 898130               | 0.921 | 0.008  | 0.013 | 0.5400  |
| rs6801032       | 3   | 68455263   | A  | G  | 898130               | 0.260 | -0.007 | 0.007 | 0.3700  |
| rs153685        | 5   | 88685213   | C  | T  | 898130               | 0.380 | -0.008 | 0.007 | 0.2300  |
| rs27853         | 5   | 107482386  | C  | G  | 898130               | 0.520 | 0.007  | 0.006 | 0.2600  |
| rs6870096       | 5   | 152566250  | C  | G  | 898130               | 0.320 | -0.003 | 0.007 | 0.6700  |
| rs73143219      | 7   | 72221624   | C  | T  | 898130               | 0.560 | -0.012 | 0.006 | 0.0670  |
| HbA1c           |     |            |    |    |                      |       |        |       |         |
| rs6801032       | 3   | 68455263   | A  | G  | 123665               | 0.150 | 0.001  | 0.002 | 0.5623  |
| rs153685        | 5   | 88685213   | C  | T  | 123665               | 0.376 | -0.003 | 0.002 | 0.1547  |
| rs27853         | 5   | 107482386  | C  | G  | 123665               | 0.500 | 0.002  | 0.004 | 0.5438  |
| rs6870096       | 5   | 152566250  | C  | G  | 123665               | 0.292 | 0.001  | 0.004 | 0.7541  |
| rs73143219      | 7   | 72221624   | C  | T  | 123665               | 0.544 | 0.002  | 0.002 | 0.1555  |
| Fasting glucose |     |            |    |    |                      |       |        |       |         |
| rs6801032       | 3   | 68455263   | A  | G  | 58074                | 0.150 | -0.003 | 0.004 | 0.5507  |
| rs153685        | 5   | 88685213   | C  | T  | 58074                | 0.624 | 0.002  | 0.004 | 0.5560  |
| rs27853         | 5   | 107482386  | C  | G  | 58074                | 0.518 | 0.001  | 0.004 | 0.8684  |
| rs73143219      | 7   | 72221624   | C  | T  | 58074                | 0.544 | 0.001  | 0.004 | 0.7500  |
| HOMA-B          |     |            |    |    |                      |       |        |       |         |
| rs6801032       | 3   | 68455263   | A  | G  | 36466                | 0.150 | -0.009 | 0.004 | 0.0310  |
| rs153685        | 5   | 88685213   | C  | T  | 36466                | 0.624 | 0.004  | 0.004 | 0.3154  |
| rs27853         | 5   | 107482386  | C  | G  | 36466                | 0.518 | -0.001 | 0.003 | 0.8210  |
| rs73143219      | 7   | 72221624   | C  | T  | 36466                | 0.544 | 0.004  | 0.003 | 0.2640  |
| HOMA-IR         |     |            |    |    |                      |       |        |       |         |
| rs6801032       | 3   | 68455263   | A  | G  | 37037                | 0.150 | -0.011 | 0.005 | 0.0240  |
| rs153685        | 5   | 88685213   | C  | T  | 37037                | 0.624 | 0.003  | 0.004 | 0.4684  |
| rs27853         | 5   | 107482386  | C  | G  | 37037                | 0.518 | -0.001 | 0.004 | 0.8293  |
| rs73143219      | 7   | 72221624   | C  | T  | 37037                | 0.544 | 0.008  | 0.004 | 0.0384  |

EA, effect allele. OA, other allele. EAF, effect allele frequency. SE, standard error

Supplementary Table 5 Evidence of association ( $p < 5 \times 10^{-8}$ ) of the SNPs used as genetic instruments from the GWAS by Klimentidis et al. for Mendelian randomization analyses of accelerometer-based physical activity and the GWAS by Doherty et al. for analyses of sedentary behavior with confounders (smoking) in PhenoScanner

| SNP                   | Chr | Position (hg38) | Trait                                                                                                                           | Excluded from sensitivity analysis |
|-----------------------|-----|-----------------|---------------------------------------------------------------------------------------------------------------------------------|------------------------------------|
| Average accelerations |     |                 |                                                                                                                                 |                                    |
| rs34517439            | 1   | 77984833        | None                                                                                                                            | No                                 |
| rs336605              | 3   | 18614858        | Body fat %, whole body fat mass, Trunk fat mass                                                                                 | No                                 |
| rs10067451            | 5   | 88646688        | Trunk fat free mass, trunk predicted mass, arm fat free mass right and left                                                     | No                                 |
| rs7084454             | 10  | 21532345        | Waist circumference, body fat %, hip circumference, trunk fat mass, leg and arm fat mass left and right, weight, trunk fat mass | No                                 |
| rs148193266           | 11  | 104657953       | None                                                                                                                            | No                                 |
| rs79724577            | 17  | 45386127        | None                                                                                                                            | No                                 |
| rs1518139             | 18  | 43171267        | Body fat %, waist circumference, BMI, leg and arm fat mass left and right, trunk fat mass, weight                               | No                                 |

| SNP                         | Chr | Position (hg38) | Trait                                   | Excluded from sensitivity analysis |
|-----------------------------|-----|-----------------|-----------------------------------------|------------------------------------|
| Vigorous activity (>425 mg) |     |                 |                                         |                                    |
| rs17006599                  | 1   | 219763423       | None                                    | No                                 |
| rs6433478                   | 2   | 174376754       | None                                    | No                                 |
| rs62443625                  | 7   | 39013531        | Body fat %, trunk fat %, Arm fat % left | No                                 |
| rs72633364                  | 8   | 34329370        | None                                    | No                                 |
| rs4754194                   | 11  | 107219461       | None                                    | No                                 |
| rs743580                    | 15  | 74035775        | BMI, leg fat % left                     | No                                 |
| rs56194509                  | 17  | 45767193        | none                                    | No                                 |
| rs1668835                   | 18  | 24898988        | none                                    | No                                 |

| SNP                | Chr | Position (hg38) | Trait | Excluded from sensitivity analysis |
|--------------------|-----|-----------------|-------|------------------------------------|
| Sedentary behavior |     |                 |       |                                    |
| rs61776614         | 1   | 2234967         | None  | No                                 |
| rs6801032          | 3   | 68455263        | None  | No                                 |
| rs153685           | 5   | 88685213        | None  | No                                 |
| rs27853            | 5   | 107482386       | None  | No                                 |
| rs6870096          | 5   | 152566250       | None  | No                                 |
| rs73143219         | 7   | 72221624        | None  | No                                 |

Abbreviations: Chr, chromosome; SNP, single nucleotide polymorphism

## Supplementary Table 6 Power-calculation

## Power-calculation – accelerometer-based average accelerations physical activity

| trait           | N <sub>cases</sub> / N <sub>controls</sub> | OR=0.9          | OR=0.85        | OR=0.8          | OR=0.75        | OR=0.7         |
|-----------------|--------------------------------------------|-----------------|----------------|-----------------|----------------|----------------|
| T2D             | 74,124/ 824,006                            | 0.258           | 0.525          | 0.793           | 0.947          | 0.993          |
| trait           | N                                          | $\beta = -0.15$ | $\beta = -0.2$ | $\beta = -0.25$ | $\beta = -0.3$ | $\beta = -0.5$ |
| HbA1C           | 123,665                                    | 1.000           | 1.000          | 1.000           | 1.000          | 1.000          |
| fasting glucose | 58,074                                     | 1.000           | 1.000          | 1.000           | 1.000          | 1.000          |
| HOMA-B          | 36,466                                     | 0.194           | 0.307          | 0.441           | 0.582          | 0.944          |
| HOMA-IR         | 36,466                                     | 0.194           | 0.307          | 0.441           | 0.582          | 0.944          |

## Power- calculation – accelerometer-based vigorous physical activity (&gt;425 mg)

| trait           | N <sub>cases</sub> / N <sub>controls</sub> | OR=0.9          | OR=0.85        | OR=0.8          | OR=0.75        | OR=0.7         |
|-----------------|--------------------------------------------|-----------------|----------------|-----------------|----------------|----------------|
| T2D             | 74,124/ 824,006                            | 0.265           | 0.538          | 0.806           | 0.953          | 0.995          |
| trait           | N                                          | $\beta = -0.15$ | $\beta = -0.2$ | $\beta = -0.25$ | $\beta = -0.3$ | $\beta = -0.5$ |
| HbA1C           | 123,665                                    | 0.053           | 0.056          | 0.059           | 0.063          | 0.086          |
| fasting glucose | 58,074                                     | 0.052           | 0.053          | 0.054           | 0.056          | 0.068          |
| HOMA-B          | 36,466                                     | 0.050           | 0.050          | 0.050           | 0.050          | 0.050          |
| HOMA-IR         | 36,466                                     | 0.050           | 0.050          | 0.050           | 0.050          | 0.050          |

## Power- calculation – sedentary behavior

| trait           | N <sub>cases</sub> / N <sub>controls</sub> | OR=1.1         | OR=1.15       | OR=1.2         | OR=1.25       | OR=1.3        |
|-----------------|--------------------------------------------|----------------|---------------|----------------|---------------|---------------|
| T2D             | 74,124/ 824,006                            | 0.197          | 0.368         | 0.562          | 0.736         | 0.861         |
| trait           | N                                          | $\beta = 0.15$ | $\beta = 0.2$ | $\beta = 0.25$ | $\beta = 0.3$ | $\beta = 0.5$ |
| HbA1C           | 123,665                                    | 1.000          | 1.000         | 1.000          | 1.000         | 1.000         |
| fasting glucose | 58,074                                     | 1.000          | 1.000         | 1.000          | 1.000         | 1.000         |
| HOMA-B          | 36,466                                     | 0.158          | 0.245         | 0.352          | 0.472         | 0.873         |
| HOMA-IR         | 36,466                                     | 0.158          | 0.245         | 0.352          | 0.472         | 0.873         |

Power calculation binary trait (Burgess PMID=24608958) continuous trait (Deng PMID=32048336)

Supplementary Table 7 Between SNP-heterogeneity

## accelerometer-based average accelerations

| outcome         | Q      | df | P-value              |
|-----------------|--------|----|----------------------|
| T2D             | 44.726 | 6  | 5.3x10 <sup>-8</sup> |
| HbA1C           | 5.114  | 4  | 0.2758               |
| fasting glucose | 1.998  | 4  | 0.7361               |
| HOMA-B          | 6.995  | 4  | 0.1362               |
| HOMA-IR         | 3.739  | 4  | 0.4425               |

## accelerometer-based vigorous physical activity (&gt;425 mg)

| outcome         | Q      | df | P-value |
|-----------------|--------|----|---------|
| T2D             | 26.752 | 7  | 0.0004  |
| HbA1C           | 4.135  | 5  | 0.5302  |
| fasting glucose | 7.435  | 5  | 0.1903  |
| HOMA-B          | 5.681  | 5  | 0.3385  |
| HOMA-IR         | 9.131  | 5  | 0.1040  |

## sedentary behavior ( MET ≤1.5)

| outcome         | Q      | df | P-value |
|-----------------|--------|----|---------|
| T2D             | 4.428  | 4  | 0.3512  |
| HbA1C           | 4.240  | 3  | 0.2366  |
| fasting glucose | 0.786  | 2  | 0.6751  |
| HOMA-B          | 6.871  | 2  | 0.0322  |
| HOMA-IR         | 10.151 | 2  | 0.0062  |

df: degree of freedom



Supplementary Table 8 Leave-one-out – accelerometer-based average accelerations

| SNP             | N <sub>outcome</sub> | OR/ beta | 95% CI        | P-value |
|-----------------|----------------------|----------|---------------|---------|
| type 2 diabetes |                      |          |               |         |
| rs10067451      | 898130               | 0.984    | 0.925; 1.047  | 0.6149  |
| rs148193266     | 898130               | 1.000    | 0.929; 1.077  | 0.9907  |
| rs1518139       | 898130               | 1.022    | 0.961; 1.086  | 0.4966  |
| rs336605        | 898130               | 1.021    | 0.963; 1.083  | 0.4791  |
| rs34517439      | 898130               | 0.996    | 0.927; 1.071  | 0.9157  |
| rs7084454       | 898130               | 1.001    | 0.929; 1.078  | 0.9807  |
| rs79724577      | 898130               | 0.991    | 0.924; 1.062  | 0.7958  |
| HbA1c           |                      |          |               |         |
| rs10067451      | 123665               | 0.001    | -0.010; 0.012 | 0.8815  |
| rs1518139       | 123665               | 0.003    | -0.006; 0.013 | 0.4928  |
| rs336605        | 123665               | 0.000    | -0.010; 0.011 | 0.9476  |
| rs7084454       | 123665               | -0.002   | -0.010; 0.006 | 0.6524  |
| rs79724577      | 123665               | 0.004    | -0.005; 0.014 | 0.3932  |
| fasting glucose |                      |          |               |         |
| rs10067451      | 58074                | 0.000    | -0.017; 0.018 | 0.9585  |
| rs1518139       | 58074                | -0.002   | -0.019; 0.016 | 0.8609  |
| rs336605        | 58074                | -0.002   | -0.020; 0.015 | 0.8070  |
| rs7084454       | 58074                | -0.005   | -0.022; 0.013 | 0.5958  |
| rs79724577      | 58074                | 0.004    | -0.014; 0.021 | 0.6769  |
| HOMA-B          |                      |          |               |         |
| rs10067451      | 36466                | -0.008   | -0.026; 0.010 | 0.3677  |
| rs1518139       | 36466                | 0.002    | -0.022; 0.025 | 0.8800  |
| rs336605        | 36466                | -0.001   | -0.025; 0.024 | 0.9613  |
| rs7084454       | 36466                | 0.003    | -0.017; 0.024 | 0.7547  |
| rs79724577      | 36466                | -0.007   | -0.028; 0.013 | 0.4858  |
| HOMA-IR         |                      |          |               |         |
| rs10067451      | 37037                | -0.008   | -0.027; 0.011 | 0.3979  |
| rs1518139       | 37037                | 0.004    | -0.016; 0.023 | 0.7213  |
| rs336605        | 37037                | 0.002    | -0.017; 0.022 | 0.8215  |
| rs7084454       | 37037                | -0.001   | -0.023; 0.020 | 0.8956  |
| rs79724577      | 37037                | -0.003   | -0.024; 0.018 | 0.7868  |

Supplementary Table 9 Leave-one-out – accelerometer-based vigorous physical activity (&gt;425 mg)

| SNP             | N <sub>outcome</sub> | OR/ beta | 95% CI        | P-value |
|-----------------|----------------------|----------|---------------|---------|
| Type 2 diabetes |                      |          |               |         |
| rs1668835       | 898130               | 0.803    | 0.515; 1.254  | 0.3355  |
| rs17006599      | 898130               | 0.760    | 0.506; 1.141  | 0.1860  |
| rs4754194       | 898130               | 0.849    | 0.542; 1.332  | 0.4769  |
| rs56194509      | 898130               | 0.748    | 0.519; 1.079  | 0.1206  |
| rs62443625      | 898130               | 0.856    | 0.546; 1.340  | 0.4960  |
| rs6433478       | 898130               | 0.910    | 0.598; 1.382  | 0.6569  |
| rs72633364      | 898130               | 0.801    | 0.516; 1.242  | 0.3215  |
| rs743580        | 898130               | 0.954    | 0.654; 1.391  | 0.8072  |
| HbA1c           |                      |          |               |         |
| rs1668835       | 123665               | -0.019   | -0.093; 0.055 | 0.6104  |
| rs17006599      | 123665               | -0.032   | -0.106; 0.042 | 0.3972  |
| rs4754194       | 123665               | 0.002    | -0.072; 0.075 | 0.9678  |
| rs56194509      | 123665               | 0.001    | -0.072; 0.074 | 0.9814  |
| rs62443625      | 123665               | -0.026   | -0.099; 0.047 | 0.4839  |
| rs743580        | 123665               | -0.031   | -0.106; 0.043 | 0.4070  |
| Fasting glucose |                      |          |               |         |
| rs1668835       | 58074                | -0.007   | -0.166; 0.151 | 0.9277  |
| rs17006599      | 58074                | 0.067    | -0.152; 0.287 | 0.5490  |
| rs4754194       | 58074                | 0.133    | -0.025; 0.290 | 0.0983  |
| rs56194509      | 58074                | 0.050    | -0.161; 0.260 | 0.6443  |
| rs62443625      | 58074                | 0.083    | -0.132; 0.298 | 0.4516  |
| rs743580        | 58074                | 0.063    | -0.141; 0.267 | 0.5459  |
| HOMA-B          |                      |          |               |         |
| rs1668835       | 36466                | 0.014    | -0.133; 0.160 | 0.8548  |
| rs17006599      | 36466                | 0.036    | -0.128; 0.201 | 0.6632  |
| rs4754194       | 36466                | 0.079    | -0.090; 0.249 | 0.3598  |
| rs56194509      | 36466                | 0.112    | -0.030; 0.254 | 0.1234  |
| rs62443625      | 36466                | 0.089    | -0.083; 0.261 | 0.3115  |
| rs743580        | 36466                | 0.078    | -0.080; 0.237 | 0.3331  |
| HOMA-IR         |                      |          |               |         |
| rs1668835       | 37037                | -0.009   | -0.184; 0.167 | 0.9235  |
| rs17006599      | 37037                | 0.089    | -0.178; 0.356 | 0.5124  |
| rs4754194       | 37037                | 0.135    | -0.112; 0.383 | 0.2845  |
| rs56194509      | 37037                | 0.126    | -0.127; 0.378 | 0.3299  |
| rs62443625      | 37037                | 0.147    | -0.101; 0.395 | 0.2441  |
| rs743580        | 37037                | 0.119    | -0.123; 0.362 | 0.3352  |

Supplementary Table 10 Leave-one-out – sedentary behavior (MET  $\leq$ 1.5)

| SNP             | N <sub>outcome</sub> | OR/ beta | 95% CI        | P-value |
|-----------------|----------------------|----------|---------------|---------|
| Type 2 diabetes |                      |          |               |         |
| rs153685        | 898130               | 0.892    | 0.675; 1.179  | 0.4213  |
| rs61776614      | 898130               | 0.806    | 0.638; 1.019  | 0.0719  |
| rs6801032       | 898130               | 0.875    | 0.656; 1.168  | 0.3662  |
| rs6870096       | 898130               | 0.809    | 0.636; 1.030  | 0.0850  |
| rs73143219      | 898130               | 0.931    | 0.732; 1.183  | 0.5564  |
| HbA1c           |                      |          |               |         |
| rs153685        | 123665               | 0.054    | -0.034; 0.143 | 0.2266  |
| rs6801032       | 123665               | -0.003   | -0.130; 0.124 | 0.9686  |
| rs6870096       | 123665               | 0.015    | -0.096; 0.126 | 0.7919  |
| rs73143219      | 123665               | -0.029   | -0.120; 0.062 | 0.5300  |
| Fasting glucose |                      |          |               |         |
| rs153685        | 58074                | -0.019   | -0.211; 0.173 | 0.8462  |
| rs6801032       | 58074                | 0.063    | -0.128; 0.255 | 0.5187  |
| rs73143219      | 58074                | -0.001   | -0.194; 0.192 | 0.9926  |
| HOMA-B          |                      |          |               |         |
| rs153685        | 36466                | -0.063   | -0.475; 0.348 | 0.7625  |
| rs6801032       | 36466                | 0.133    | -0.041; 0.307 | 0.1344  |
| rs73143219      | 36466                | -0.069   | -0.464; 0.326 | 0.7315  |
| HOMA-IR         |                      |          |               |         |
| rs153685        | 37037                | -0.022   | -0.677; 0.633 | 0.9466  |
| rs6801032       | 37037                | 0.209    | 0.000; 0.419  | 0.0498  |
| rs73143219      | 37037                | -0.119   | -0.576; 0.338 | 0.6106  |

Supplementary Table 11 MR-Egger Test on Intercept

| accelerometer-based average accelerations |           |            |         |
|-------------------------------------------|-----------|------------|---------|
| outcome                                   | intercept | std. error | P-value |
| T2D                                       | -0.0513   | 0.0327     | 0.1775  |
| HbA1C                                     | 0.0046    | 0.0087     | 0.6327  |
| fasting glucose                           | 0.01450   | 0.0140     | 0.3777  |
| HOMA-B                                    | -0.0329   | 0.0131     | 0.0870  |
| HOMA-IR                                   | -0.0273   | 0.0156     | 0.1778  |

  

| accelerometer-based vigorous PA (>425 mg) |           |            |         |
|-------------------------------------------|-----------|------------|---------|
| outcome                                   | intercept | std. error | P-value |
| T2D                                       | -0.0538   | 0.0981     | 0.6030  |
| HbA1C                                     | -0.0051   | 0.0163     | 0.7696  |
| fasting glucose                           | 0.0529    | 0.0347     | 0.2016  |
| HOMA-B                                    | 0.0224    | 0.0322     | 0.5258  |
| HOMA-IR                                   | 0.0683    | 0.0396     | 0.1598  |

  

| sedentary behavior (MET ≤1.5) |           |            |         |
|-------------------------------|-----------|------------|---------|
| outcome                       | intercept | std. error | P-value |
| T2D                           | -0.0245   | 0.0183     | 0.2716  |
| HbA1C                         | 0.0031    | 0.0283     | 0.9239  |
| fasting glucose               | 0.0305    | 0.0402     | 0.5870  |
| HOMA-B                        | 0.0933    | 0.0372     | 0.2417  |
| HOMA-IR                       | 0.1408    | 0.0442     | 0.1937  |
